# Supplementary material for: Impacts of Constitutive and Induced Benzoxazinoids Levels on Wheat Resistance to the Grain Aphid (Sitobion avenae)
Source: MDPI journal article supplement (doi:10.3390/metabo11110783), 2021-11-16
Supplement: s1 [file s1]

**Table S1.** Mass spectra information of benzoxazinoids.

| Compound   | RT(min) | Ionization                                  | Precursor<br>( <i>m/z</i> ) | Neutral Loss fragment(Da)                                                   | MS <sup>2</sup> Ions <i>m/z</i><br>(relative intensity) |
|------------|---------|---------------------------------------------|-----------------------------|-----------------------------------------------------------------------------|---------------------------------------------------------|
| DHBOA-Glc  | 5.80    | [M+FA-H] <sup>-</sup><br>[M-H] <sup>-</sup> | 388<br>342                  | FA (46)                                                                     | 342 (100)                                               |
|            |         |                                             |                             | Glc (162)                                                                   | 180 (100)                                               |
|            |         |                                             |                             | Glc + H <sub>2</sub> O (180)                                                | 162 (6)                                                 |
|            |         |                                             |                             | Glc + CO (190)                                                              | 152 (6)                                                 |
| HBOA-Glc   | 7.04    | [M-H] <sup>-</sup>                          | 326                         | Glc (162)                                                                   | 164 (100)                                               |
|            |         |                                             |                             | Glc + CO (190)                                                              | 136 (6)                                                 |
|            |         |                                             |                             | Glc + 2CO (218)                                                             | 108 (6)                                                 |
| HMBOA-Glc  | 7.56    | [M-H] <sup>-</sup>                          | 356                         | Glc (162)                                                                   | 194 (100)                                               |
|            |         |                                             |                             | Glc + CO (190)                                                              | 166 (5)                                                 |
|            |         |                                             |                             | Glc + 2CO (218)                                                             | 138 (5)                                                 |
| DIMBOA-Glc | 7.78    | [M+FA-H] <sup>-</sup><br>[M-H] <sup>-</sup> | 418<br>372                  | FA (46)                                                                     | 372 (100)                                               |
|            |         |                                             |                             | Glc (162)                                                                   | 210 (27)                                                |
|            |         |                                             |                             | Glc + H <sub>2</sub> O (180)                                                | 192 (18)                                                |
|            |         |                                             |                             | Glc + H <sub>2</sub> O + CO (208)                                           | 164 (100)                                               |
|            |         |                                             |                             | Glc + H <sub>2</sub> O + CO + CH <sub>3</sub> (223)                         | 149 (95)                                                |
| HDMBOA-Glc | 9.29    | [M+FA-H] <sup>-</sup>                       | 432                         | OCH <sub>3</sub> (31)                                                       | 401 (13)                                                |
|            |         |                                             |                             | OCH <sub>3</sub> + FA - H (76)                                              | 356 (100)                                               |
|            |         |                                             |                             | Glc + H <sub>2</sub> O + CO (208)                                           | 224 (10)                                                |
|            |         |                                             |                             | Glc + OCH <sub>3</sub> + FA-H (238)                                         | 194 (21)                                                |
|            |         |                                             |                             | Glc + OCH <sub>3</sub> + CH <sub>2</sub> O + FA - H (268)                   | 164 (20)                                                |
|            |         |                                             |                             | Glc + OCH <sub>3</sub> + CH <sub>2</sub> O + CH <sub>3</sub> + FA - H (283) | 149 (10)                                                |
| DIMBOA     | 9.64    | [M+FA-H] <sup>-</sup><br>[M-H] <sup>-</sup> | 256<br>210                  | FA (46)                                                                     | 210 (100)                                               |
|            |         |                                             |                             | H <sub>2</sub> O + CO (46)                                                  | 164 (100)                                               |
|            |         |                                             |                             | H <sub>2</sub> O + CO + CH <sub>3</sub> (61)                                | 149 (45)                                                |

Note: RT, Retention Time; FA, formic acid; [M + FA - H]<sup>-</sup>, FA adduct; [M - H]<sup>-</sup>, deprotonated ion; Glc, glucoside.
