# Supplementary material for: Impacts of Constitutive and Induced Benzoxazinoids Levels on Wheat Resistance to the Grain Aphid (Sitobion avenae)
Source: MDPI journal article supplement (doi:10.3390/metabo11110783), 2021-11-16
Supplement: s1 [file s1]

**Table S2.** The wheat varieties/lines used in this study.

| <b>Name (Abbreviation)</b> | <b>Origin</b>                                                     |
|----------------------------|-------------------------------------------------------------------|
| Xiaoyan 6 (XY6)            | Hybrid of <i>Triticum aestivum</i> and <i>Thinopyrum ponticum</i> |
| Xiaoyan 22 (XY22)          | (Xiaoyan 6×775-1)×Xiaoyan 107                                     |
| Xiaoyan22-3(XY22-3)        | Sib-line of Xiaoyan 22                                            |
| Xiaoyan22-5(XY22-5)        | Sib-line of Xiaoyan 22                                            |
| 186Tm47(Tm-47)             | Hybrid of <i>T. aestivum</i> and <i>T. monococcum</i>             |
| 186Tm39(Tm-39)             | Hybrid of <i>T. aestivum</i> and <i>T. monococcum</i>             |
| 98-10-30                   | Hybrid of <i>T. aestivum</i> and <i>T. turgidum</i>               |
| 98-10-19                   | Hybrid of <i>T. aestivum</i> and <i>T. turgidum</i>               |
| Xinong979 (XN979)          | Derived line of Xiaoyan 6                                         |
| Mingxian169 (MX169)        | <i>T. aestivum</i> from China                                     |
| Aikang58 (AK58)            | <i>T. aestivum</i> from China                                     |
| Shan122 (S122)             | <i>T. aestivum</i> from China                                     |
| Xinong1376 (XN1376)        | <i>T. aestivum</i> from China                                     |
